# Supplementary material
Source: PubMed Central journal article supplement (PMC261899)
Supplement: pbio.0000045.sd008.pdf [file pbio.0000045.sd008.pdf]

# The Genome Sequence of *Caenorhabditis briggsae*: A Platform for Comparative Genomics

The nematodes *Caenorhabditis briggsae* and *Caenorhabditis elegans* diverged 80–110 million years ago, near to the time of divergence of human from mouse, but the nematodes are almost indistinguishable morphologically, have a very similar genome size, and occupy the same ecological niche. To explore the basis of this morphological and functional conservation, the genome sequence of *C. briggsae* has now been determined to a high quality draft stage and compared with that of *C. elegans*. These figures demonstrate the high degree of morphological similarity between *C. briggsae* and *C. elegans* and show how the patterns of evolutionary conservation between the two species vary across the five autosomes (I–V) and sex chromosome (X) of *C. elegans*.

Lincoln D. Stein,<sup>1\*</sup> Zhirong Bao,<sup>2,9</sup> Darin Blasiar,<sup>3</sup> Thomas Blumenthal,<sup>4</sup> Michael R. Brent,<sup>5</sup> Nansheng Chen,<sup>1</sup> Asif Chinwalla,<sup>3</sup> Laura Clarke,<sup>6</sup> Chris Clee,<sup>6</sup> Avril Coghlan,<sup>7</sup> Alan Coulson,<sup>6,13</sup> Peter D'Eustachio,<sup>1,8</sup> David H. A. Fitch,<sup>14</sup> Lucinda A. Fulton,<sup>3</sup> Robert E. Fulton,<sup>3</sup> Sam Griffiths-Jones,<sup>6</sup> Todd W. Harris,<sup>1</sup> LaDeana W. Hillier,<sup>3,9</sup> Ravi Kamath,<sup>6</sup> Patricia E. Kuwabara,<sup>6</sup> Elaine R. Mardis,<sup>3</sup> Marco A. Marra,<sup>3,10</sup> Tracie L. Miner,<sup>3</sup> Patrick Minx,<sup>3</sup> James C. Mullikin,<sup>6,11</sup> Robert W. Plumb,<sup>6</sup> Jane Rogers,<sup>6</sup> Jacqueline E. Schein,<sup>3,10</sup> Marc Sohmann,<sup>6</sup> John Spieth,<sup>3</sup> Jason E. Stajich,<sup>12</sup> Chaochun Wei,<sup>5</sup> David Willey,<sup>6</sup> Richard K. Wilson,<sup>3</sup> Richard Durbin,<sup>6</sup> Robert H. Waterston<sup>3,9</sup>

<sup>1</sup> Cold Spring Harbor Laboratory, Cold Spring Harbor, New York, United States of America, <sup>2</sup> Department of Genetics, Washington University School of Medicine, St. Louis, Missouri, United States of America, <sup>3</sup> Genome Sequencing Center, Washington University School of Medicine, St. Louis, Missouri, United States of America, <sup>4</sup> Biochemistry and Molecular Genetics, University of Colorado, Denver, Colorado, United States of America, <sup>5</sup> Department of Computer Science and Engineering, Washington University, St. Louis, Missouri, United States of America, <sup>6</sup> Wellcome Trust Sanger Institute, Hinxton, United Kingdom, <sup>7</sup> Department of Genetics, Trinity College, Dublin, Ireland, <sup>8</sup> New York University School of Medicine, New York, New York, United States of America, <sup>9</sup> Department of Genome Sciences, University of Washington, Seattle, Washington, United States of America, <sup>10</sup> Genome Sciences Centre, British Columbia Cancer Agency, Vancouver, Canada, <sup>11</sup> National Institutes of Health, Bethesda, Maryland, United States of America, <sup>12</sup> Department of Molecular Genetics and Microbiology, Duke University, Durham, North Carolina, United States of America, <sup>13</sup> Medical Research Council Laboratory of Molecular Biology, Cambridge, United Kingdom, <sup>14</sup> Department of Biology, New York University, New York, New York, United States of America

DOI: 10.1371/journal.pbio.0000045

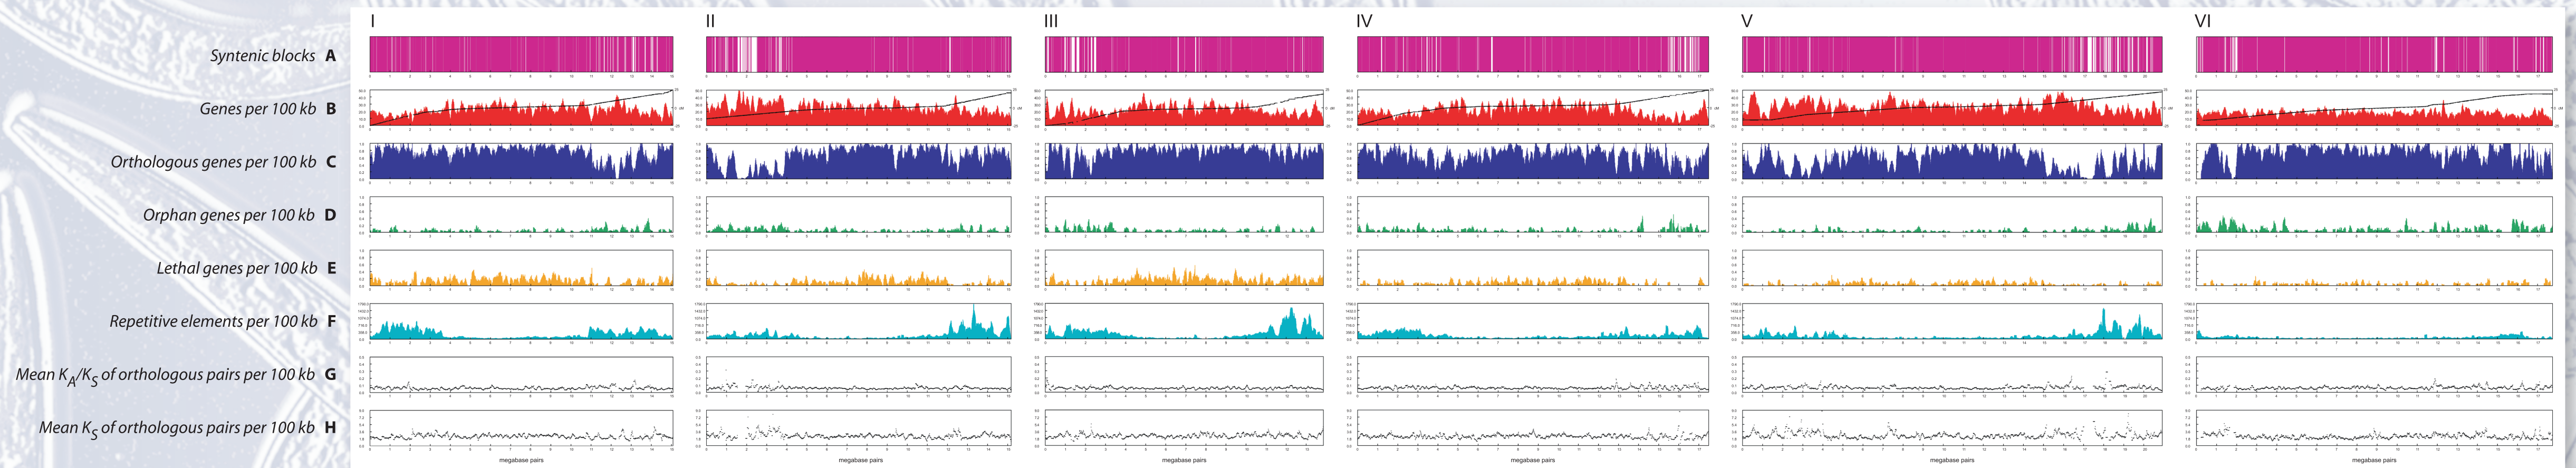

Each panel corresponds to a *C. elegans* chromosome, and the individual tracks show different measurements of evolutionary divergence:

**Track A** Regions of synteny (colinearity) between *C. elegans* and *C. briggsae*. White areas correspond to areas where the two genomes could not be aligned due to divergence, and are more abundant in the chromosome arms.

**Track B** *C. elegans* gene density and genetic map position. Gene density is plotted as a histogram, showing a relatively uniform distribution of genes across each chromosome. The relationship of the position of genes on the genetic map to their position on the sequence is superimposed on the Y axis. Steeper slopes in this plot indicate higher rates of meiotic recombination. Inflection points in the genetic map plot reflect the division of the chromosomes into recombinationally active "arms" and recombinationally slow "centers."

**Track C** *C. elegans/C. briggsae* orthologs normalized for gene density in 100 kbp sliding windows. Prominent regions of low ortholog density are seen on chromosome arms.

**Track D** *C. elegans* "orphans," genes with no significant protein similarity in *C. briggsae* or the non-*C. elegans* portion of SwissProt. This histogram has been normalized for gene density in 100 kbp sliding windows. Spikes in orphan density seem to correlate with regions of low-ortholog density.

**Track E** *C. elegans* genes that mutate to lethality or are lethal in RNAi screens, in 100 kbp sliding windows normalized to overall gene density. This track shows the distribution of essential genes and demonstrates their tendency to cluster in the chromosome centers.

**Track F** Repetitive elements, binned in 100 kbp sliding windows. Repeat-rich regions correlate with both the absence of significant syntenic coverage and ortholog-poor regions.

**Track G** The mean ratio of non-synonymous amino acid substitutions to synonymous amino acid substitutions ( $K_A/K_S$ ) in ortholog pairs in 100 kbp sliding windows. Lower values indicate greater levels of purifying selection.

**Track H** The mean rate of synonymous amino acid substitutions ( $K_S$ ) within ortholog pairs, in 100 kbp sliding windows.

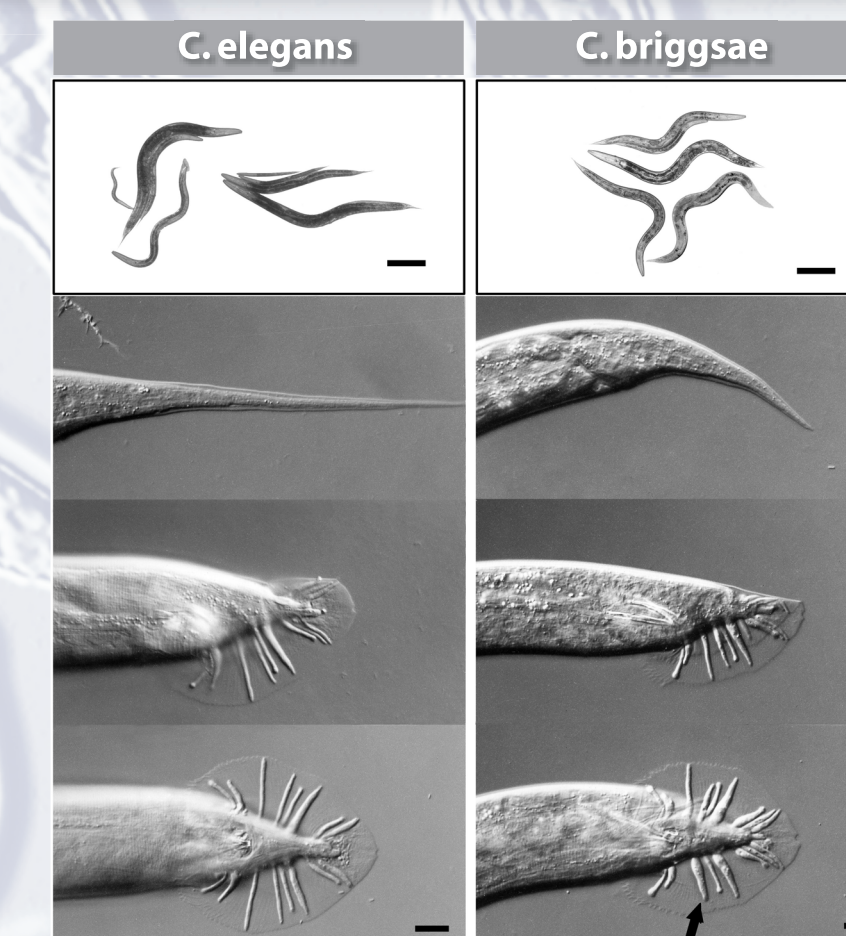

Shown are photomicrographs of *C. elegans* (strain CB4088; left panels) and *C. briggsae* (strain PB102; right panels). Depicted from top to bottom for each species are low-magnification, polarized-light images of whole worms (top panels; bar is 200  $\mu$ m), higher magnification Nomarski DIC images of female (hermaphrodite) tails, and left lateral and ventral views of male tails (bottom panels; bar is 10  $\mu$ m). The arrow in the lower right panel indicates an instance of the fairly frequent fusion of rays 3 and 4 in this strain of *C. briggsae*, one of the morphological features used to distinguish the two species (from Fitch and Emmons 1995).

Fitch DHA, Emmons SW (1995) Variable cell positions and cell contacts underlie morphological evolution of the rays in the male tails of nematodes related to *Caenorhabditis elegans*. *Dev Biol* 170: 564–582.
